# Supplementary material for: Direct synthesis of hollow single-crystalline zeolite beta using a small organic lactam as a recyclable hollow-directing agent
Source: Royal Society of Chemistry journal article supplement (doi:10.1039/c9ta01693g), 2019-01-01
Supplement: c9ta01693g1.pdf [file c9ta01693g1.pdf]

## Supporting Information

### **Direct synthesis of hollow single-crystalline zeolite Beta using a small organic lactam as a recyclable hollow-directing agent**

Dongpu Zhao<sup>a,b</sup>, Yanan Wang<sup>a,b</sup>, Weifeng Chu<sup>a,b</sup>, Xinyi Wang<sup>a,c</sup>, Xiangxue Zhu<sup>a</sup>, Xiujie Li<sup>a</sup>, Sujuan Xie<sup>a</sup>, Hongxia Wang<sup>c</sup>, Shenglin Liu<sup>a\*</sup>, and Longya Xu<sup>a\*</sup>

<sup>a</sup> *State Key Laboratory of Catalysis, Dalian Institute of Chemical Physics, Chinese Academy of Sciences, Dalian 116023, Liaoning, China*

<sup>b</sup> *University of Chinese Academy of Sciences, Beijing 100049, China*

<sup>c</sup> *Key Laboratory of Photochemical Biomaterials and Energy Storage Materials, College of Chemistry and Chemical Engineering, Harbin Normal University, Harbin, Heilongjiang Province 150025, China*

\* Correspondence to: [lyxu@dicp.ac.cn](mailto:lyxu@dicp.ac.cn), [slliu@dicp.ac.cn](mailto:slliu@dicp.ac.cn)

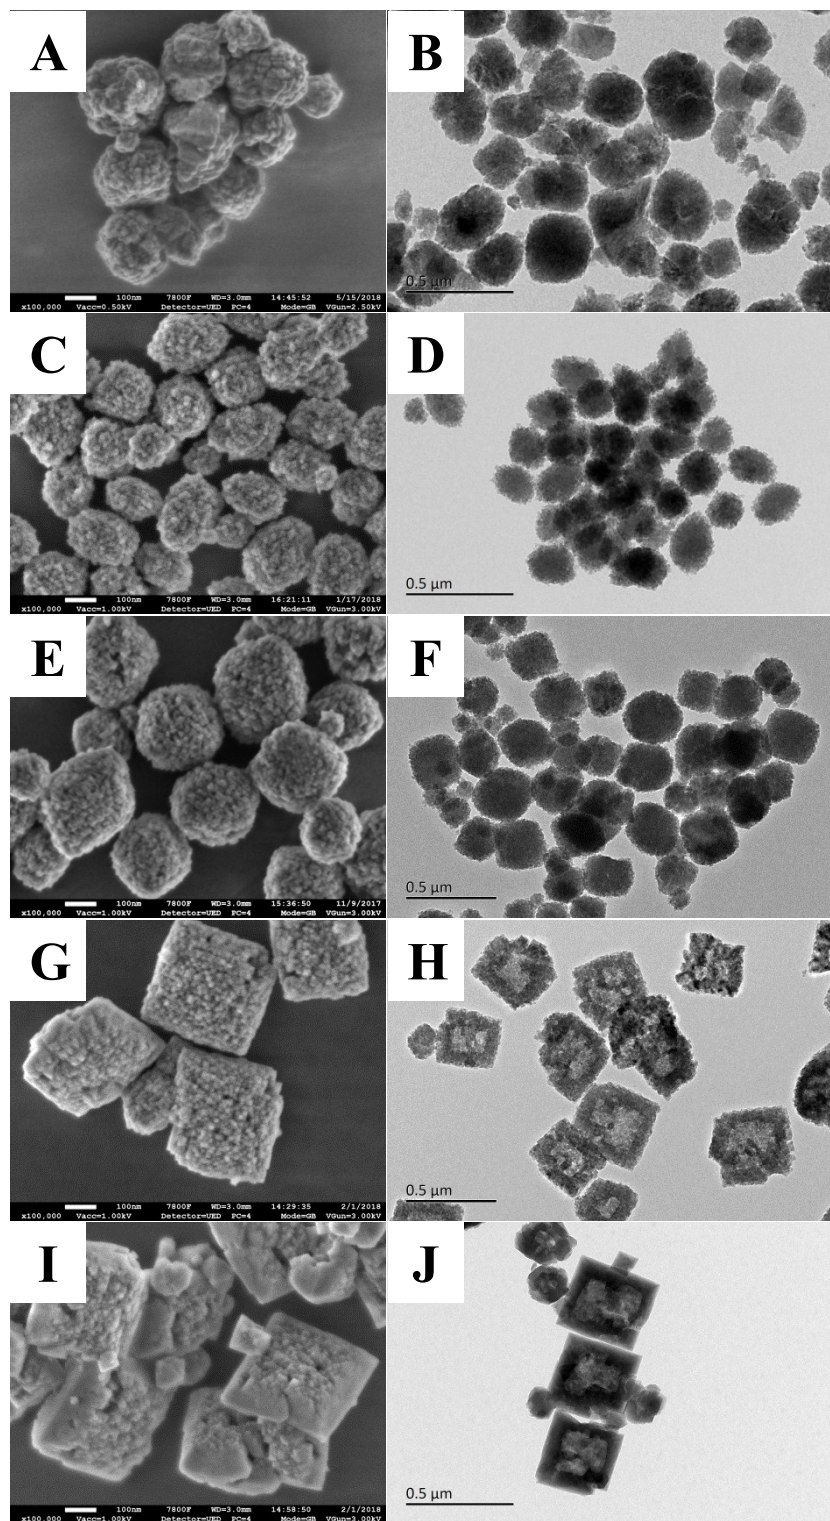

**Fig. S1** FESEM and TEM images of zeolites Beta synthesized with NMP/SiO<sub>2</sub> molar ratios of 0.0 (A and B), 1.0 (C and D), 2.0 (E and F), 3.0 (G and H) and 4.0 (I and J).

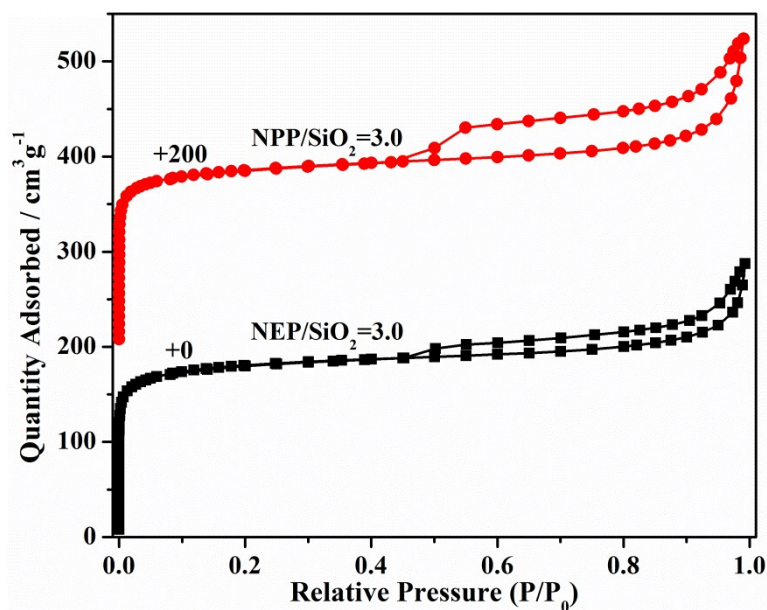

**Fig. S2** Nitrogen sorption isotherms of the hollow zeolites Beta synthesized with  $\text{NEP}/\text{SiO}_2 = 3.0$  and  $\text{NPP}/\text{SiO}_2 = 3.0$ .

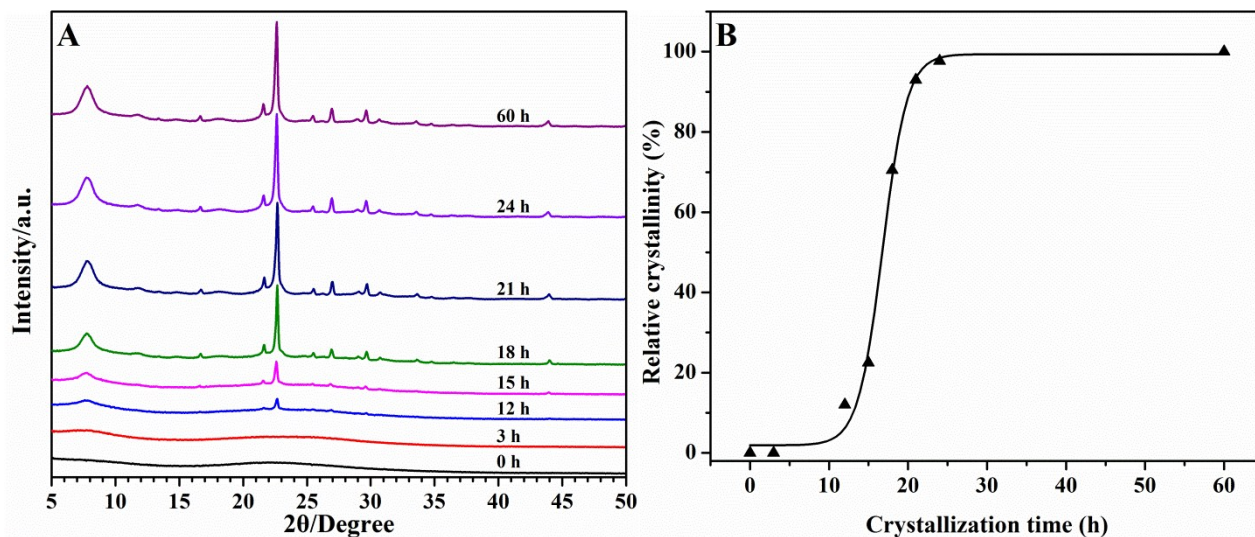

**Fig. S3** (A) XRD patterns of as-synthesized Ho-Beta samples crystallized at  $140\text{ }^\circ\text{C}$  for different periods of time. (B) The crystallization curve based on the XRD results.



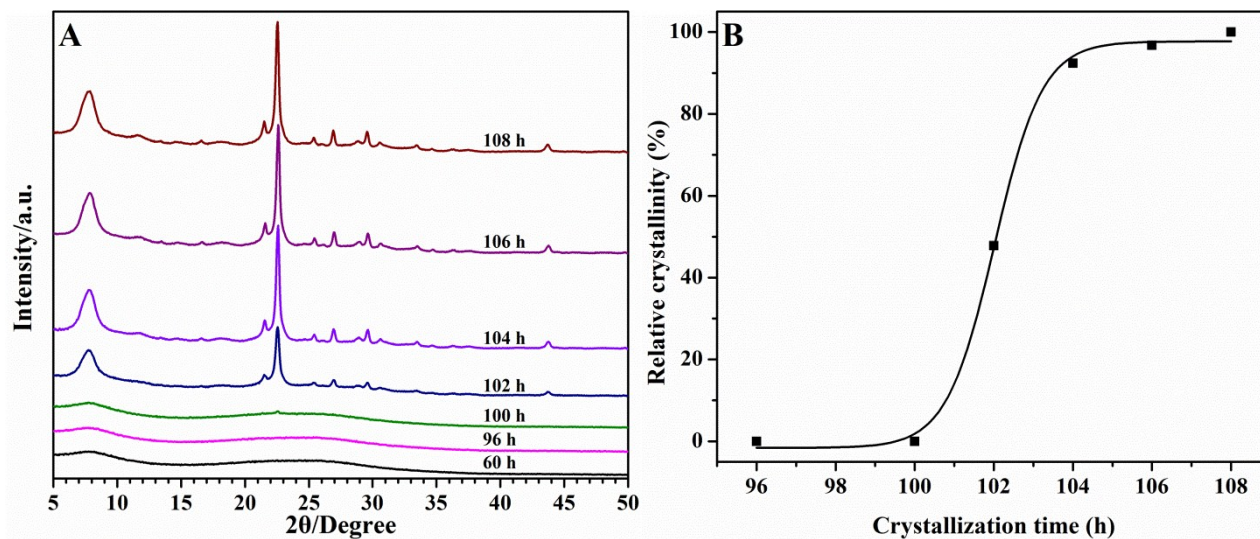

**Fig. S4** (A) XRD patterns of as-synthesized C-Beta samples crystallized at 140 °C for different periods of time. (B) The crystallization curve based on the XRD results.

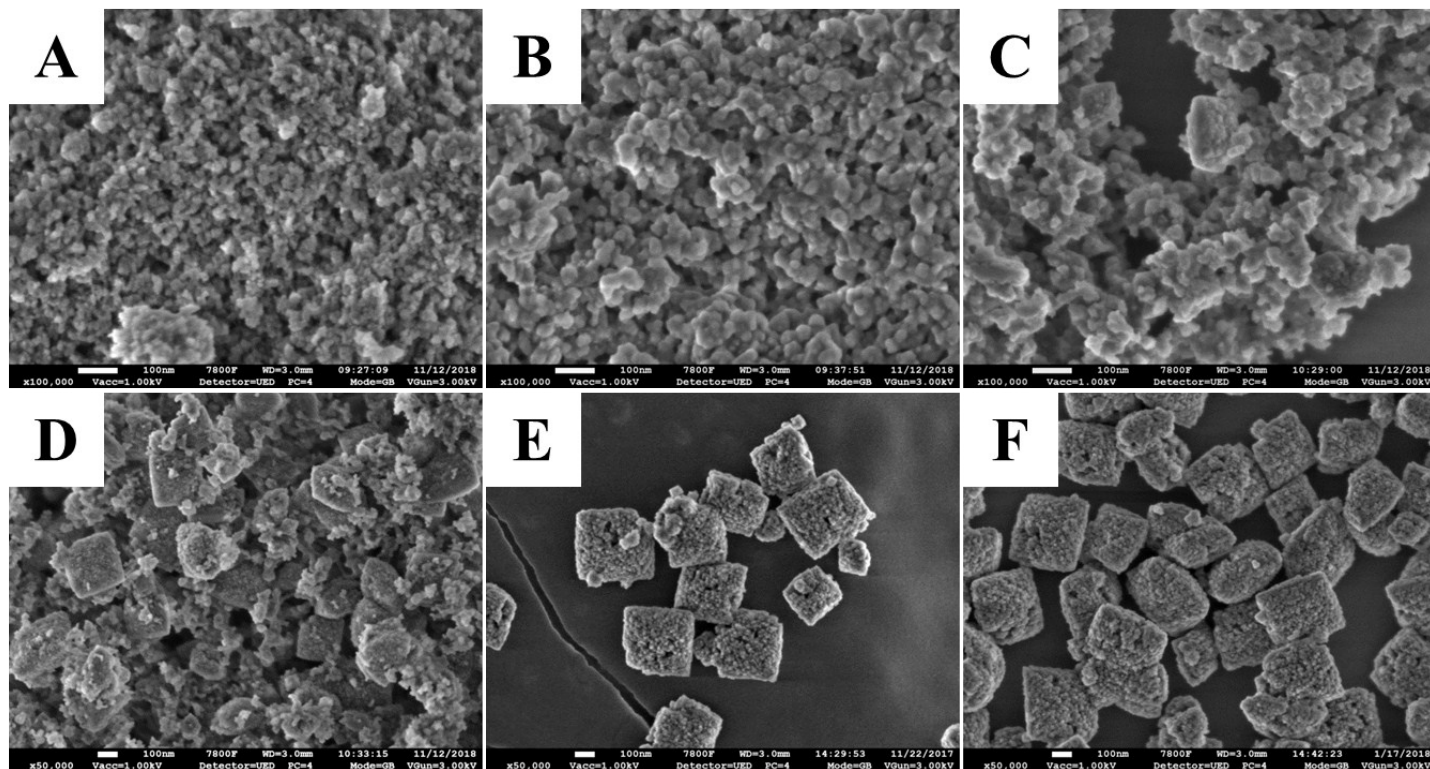

**Fig. S5** FESEM images of the products (with NMP/SiO<sub>2</sub> molar ratio of 3.0) synthesized at 140 °C for different periods of time: (A) 0 h, (B) 3 h, (C) 12 h, (D) 18 h, (E) 21 h, and (F) 24 h.



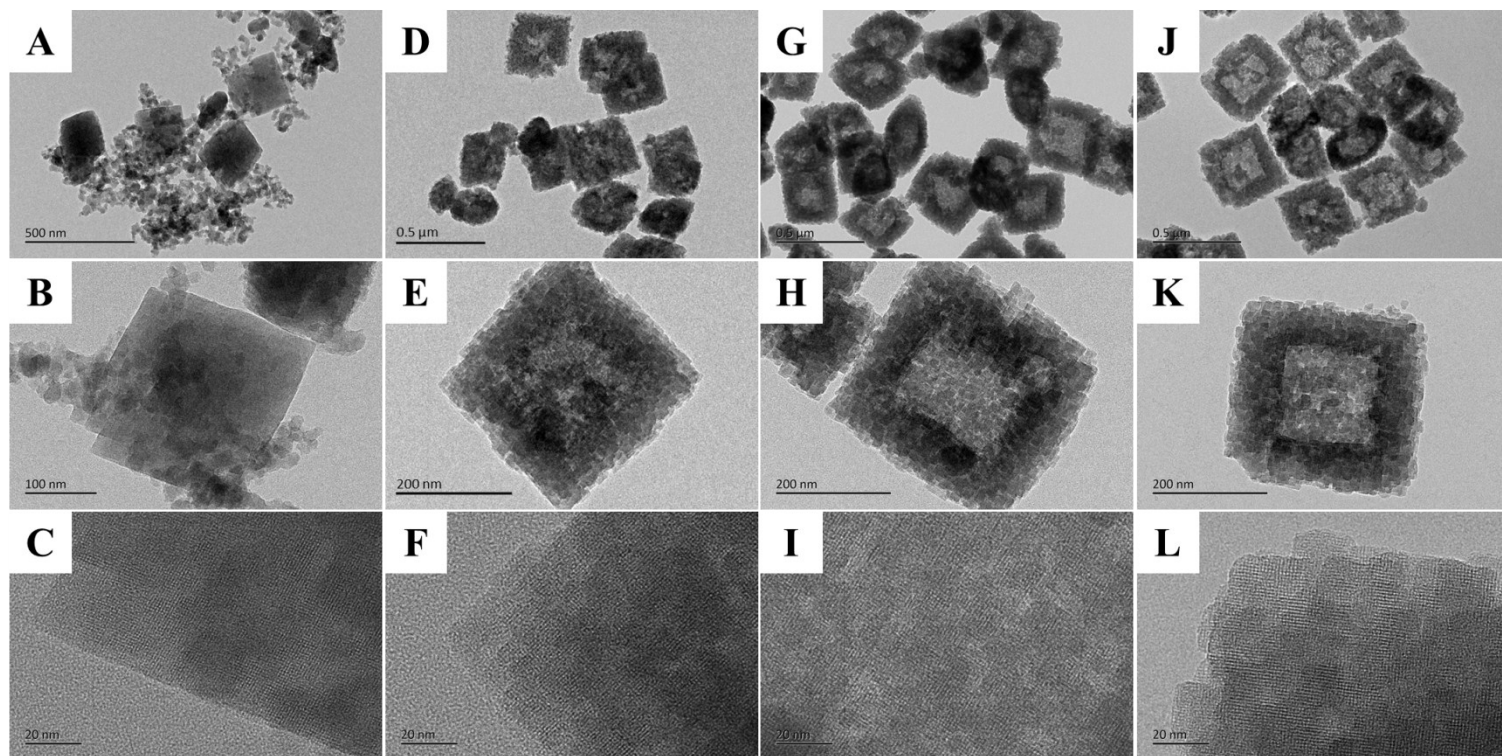

**Fig. S6** TEM and HRTEM images of the products (with NMP/SiO<sub>2</sub> molar ratio of 3.0) synthesized at 140 °C for different periods of time: (A, B and C) 18 h, (D, E and F) 21 h, (G, H and I) 24 h, (J, K and L) 60 h.

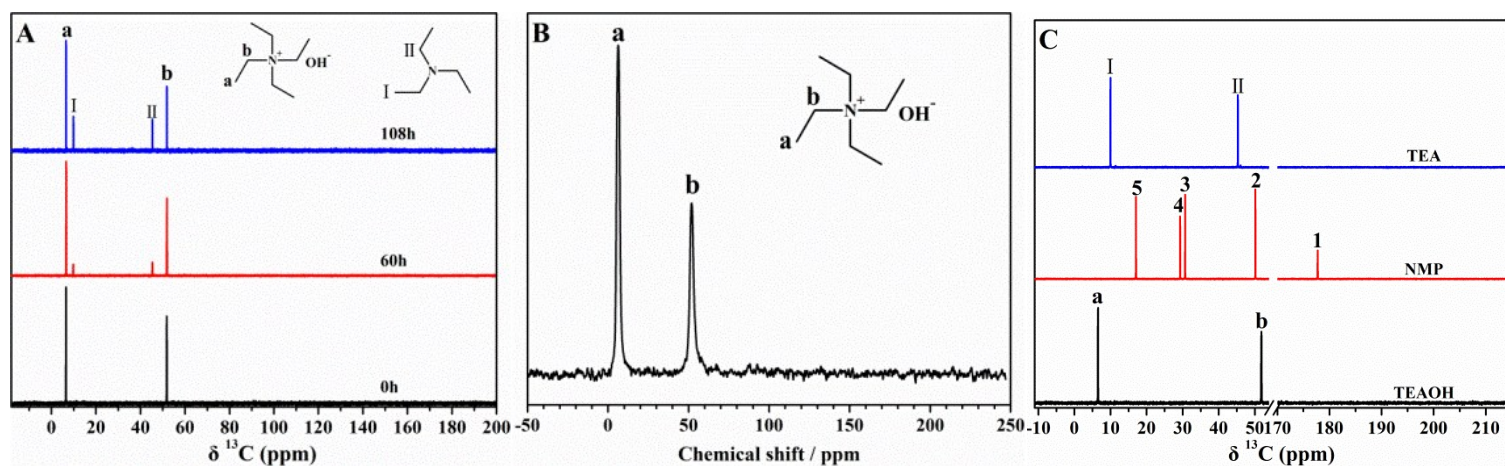

**Fig. S7** (A) Liquid-state <sup>13</sup>C NMR spectra of the supernatants synthesized without NMP. (B) Solid-state <sup>13</sup>C NMR spectrum of the final product (synthesized at 140 °C for 108 h). (C) Liquid-state <sup>13</sup>C NMR spectra of aqueous TEAOH, NMP and TEA.

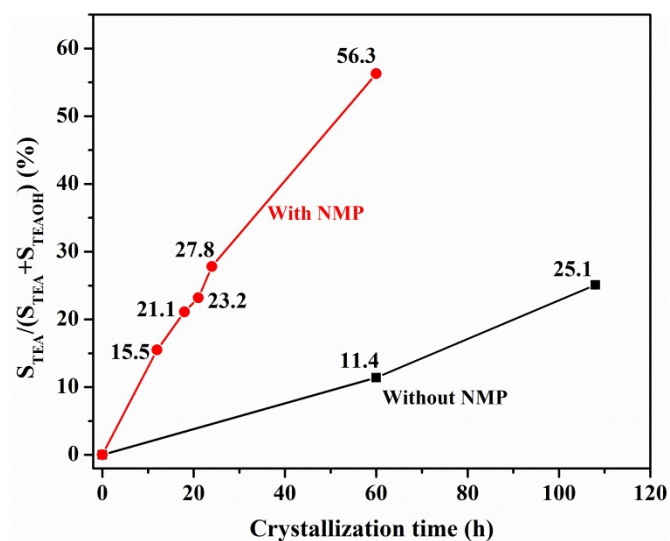

**Fig. S8** Thermal decomposition curves of TEAOH with time for the samples synthesized with and without NMP at 140 °C.

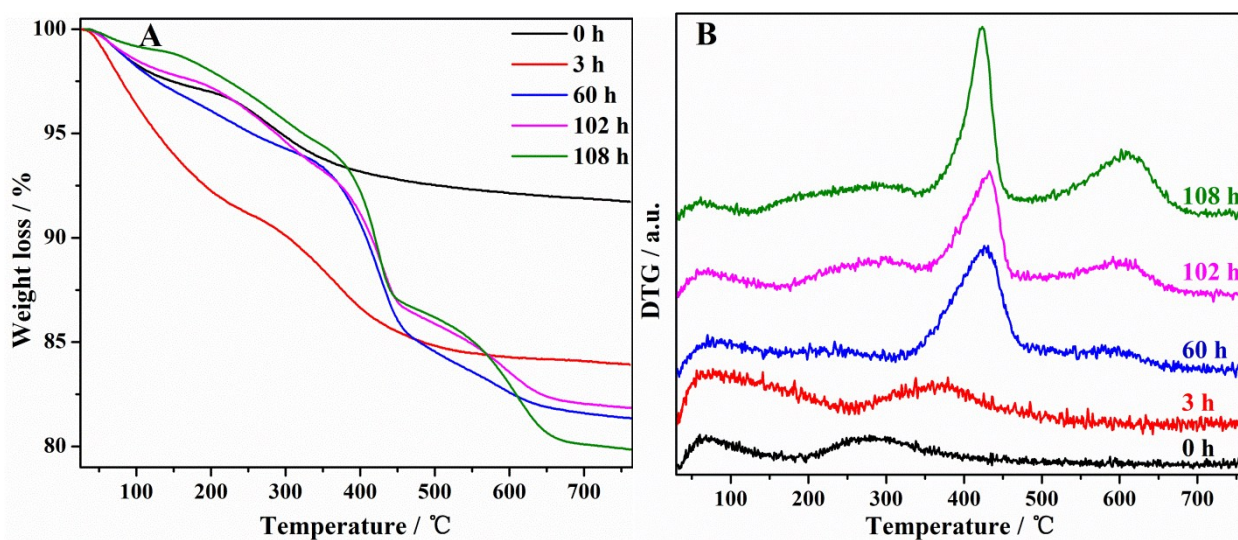

**Fig. S9** (A) TG and (B) DTG curves of the products synthesized without NMP for different periods of time.



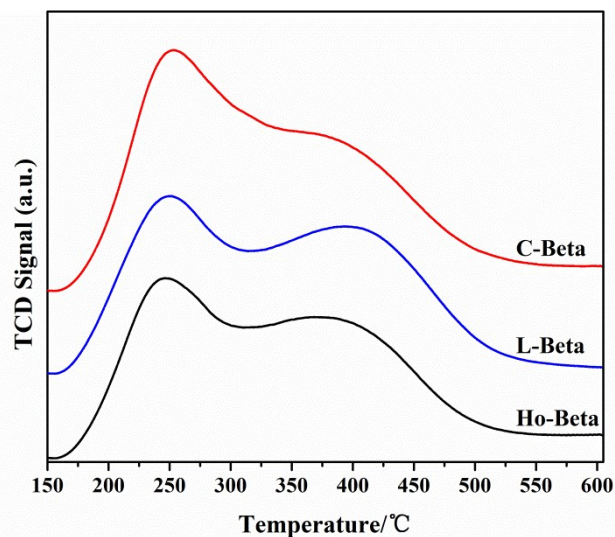

**Fig. S10** NH<sub>3</sub>-TPD profiles of Ho-Beta, C-Beta and L-Beta catalysts.

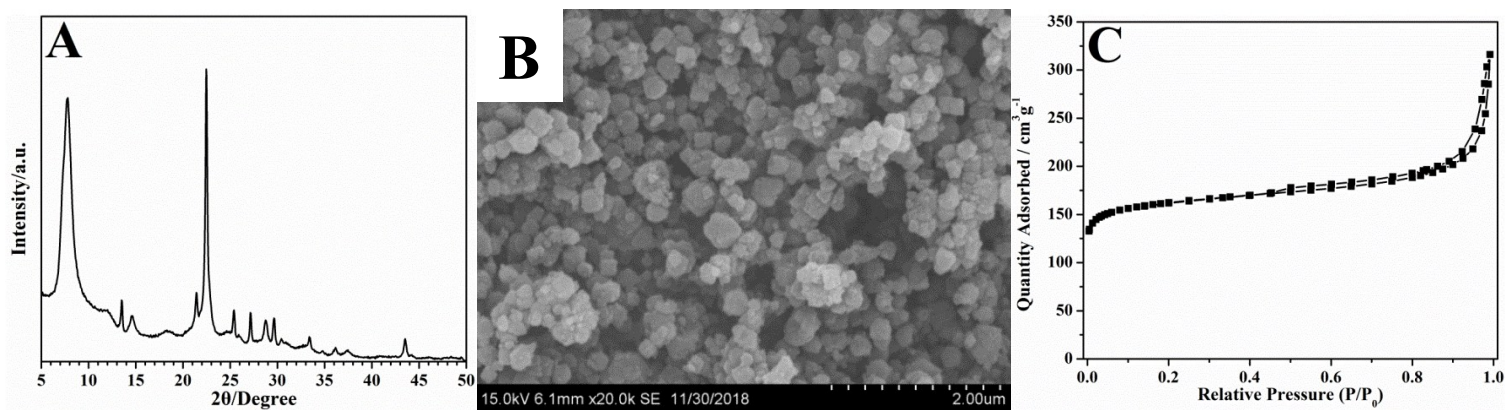

**Fig. S11** (A) XRD pattern, (B) SEM image and (C) nitrogen sorption isotherm of L-Beta catalyst (H-form).
